# Supplementary material
Source: PubMed Central journal article supplement (PMC3416371)
Supplement: supp_78.14.4959_AEM00260-12_supplemental.pdf [file supp_78.14.4959_AEM00260-12_supplemental.pdf]

1 **Supplemental figure 1.** SDS-PAGE of MPlaG at purification step. The proteins were  
2 analyzed on 12% SDS-PAGE and stained with Coomassie brilliant blue R-250. Lane M,  
3 prestained protein ladder, the molecular standard marker (kDa, Fermentas); lane 1,  
4 cellular extract of *E. coli* BL21(DE3) harboring pET-MPlaG after IPTG induction; lane  
5 2, the eluted protein from the Ni-NTA column chromatography; lane 3, the purified  
6 protein after dialysis and concentration.

7

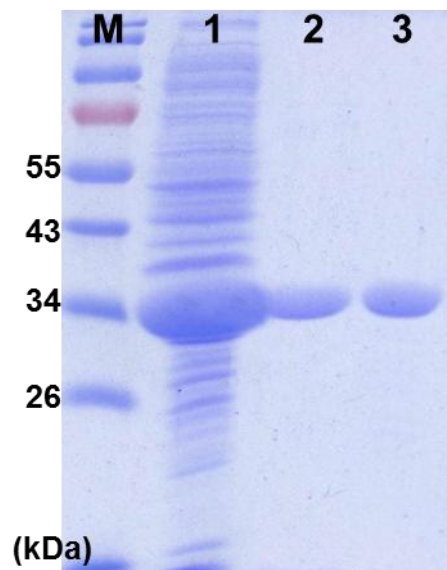

8

1 **Supplemental figure 2.** Interfacial activation of MPlA<sub>G</sub>. Activity was determined by  
2 pH-stat method at varying concentrations of tributyrin. The large increase in activity  
3 was observed at more than 1.5mM of tributyrin.

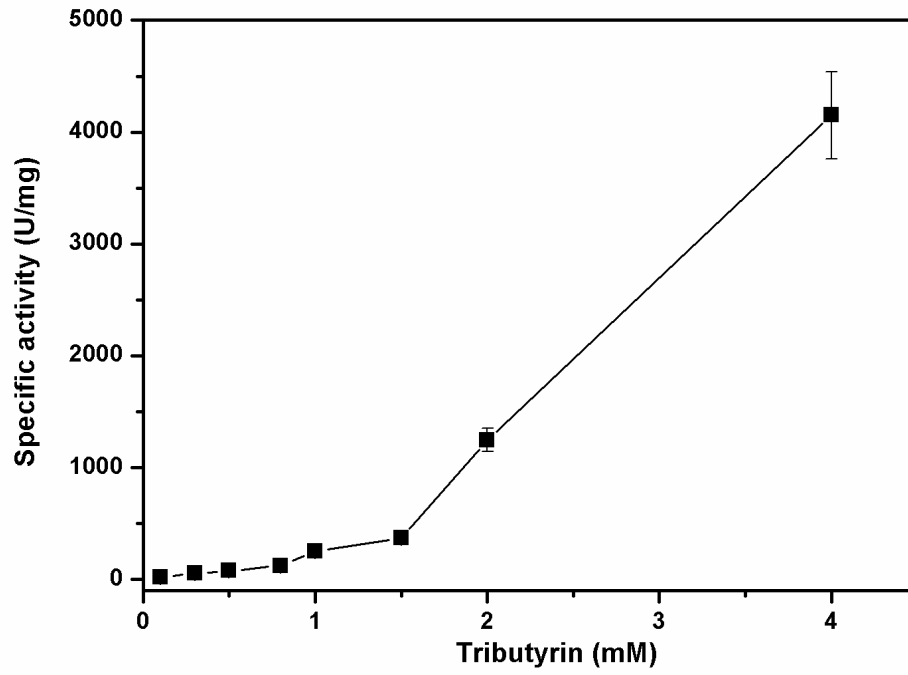

4

5

1 **Supplemental Table 1.** Effect of metal ions and inhibitors on the MPlaG

2

| Compounds         | Relative activity (%) <sup>a</sup> |      |     |
|-------------------|------------------------------------|------|-----|
|                   | at concentration (mM) of           |      |     |
|                   | 1                                  | 5    | 10  |
| CaCl <sub>2</sub> | 466                                | 1015 | 994 |
| CuCl <sub>2</sub> | 135                                | 32   | 11  |
| MgCl <sub>2</sub> | 105                                | 198  | 142 |
| FeSO <sub>4</sub> | 137                                | 142  | 151 |
| ZnCl <sub>2</sub> | 107                                | 9    | 5   |
| NiCl <sub>2</sub> | 62                                 | 23   | 7   |
| CoCl <sub>2</sub> | 120                                | 177  | 116 |
| EDTA              | 78                                 | 0    | 0   |
| PMSF              | 94                                 | 95   | 47  |
| DTT               | 93                                 | 107  | 105 |

3 <sup>a</sup>The relative activities are given as a percentage of the activity in the absence of cations,  
 4 EDTA, PMSF, and DTT.

5

1 **Supplemental Table 2.** Effect of organic solvents on the MPlaG

2

| Organic solvents | Relative activity (%) <sup>a</sup> |     |    |    |
|------------------|------------------------------------|-----|----|----|
|                  | at concentration (% , v/v) of      |     |    |    |
|                  | 20                                 | 30  | 50 | 60 |
| DMSO             | 98                                 | 97  | 98 | 81 |
| DMF              | 99                                 | 100 | 93 | 98 |
| 2-propanol       | 101                                | 97  | 96 | 99 |
| Ethanol          | 100                                | 95  | 94 | 98 |
| Methanol         | 100                                | 101 | 93 | 98 |
| Butanol          | 95                                 | 59  | 48 | 64 |
| Acetonitrile     | 100                                | 99  | 98 | 99 |
| Acetone          | 96                                 | 100 | 96 | 99 |
| Ethylacetate     | 102                                | 83  | 60 | 50 |

3 <sup>a</sup>The relative activities are given as a percentage of the activity in the absence of organic  
4 solvents.

5

1 **Supplemental Table 3.** Effect of detergents on the MPLaG

2

| Compounds    | Relative activity (%) <sup>a</sup><br>at concentration (% v/v) of |    |    |
|--------------|-------------------------------------------------------------------|----|----|
|              | 0.1                                                               | 1  | 5  |
| CHAPS        | 94                                                                | 92 | 82 |
| Taurocholate | 96                                                                | 85 | 72 |
| Deoxycholate | 95                                                                | 88 | 82 |
| Tween 20     | 86                                                                | 29 | 16 |
| Tween 40     | 83                                                                | 56 | 31 |
| Tween 60     | 88                                                                | 69 | 89 |
| Tween 80     | 84                                                                | 66 | 68 |
| Triton X-100 | 90                                                                | 44 | 22 |
| SDS          | 94                                                                | 90 | 12 |

3 <sup>a</sup>The relative activities are given as a percentage of the activity in the absence of  
4 detergents.
